# Supplementary material for: Restricted Nitrogen and Water Applications in the Orchard Modify the Carbohydrate and Amino Acid Composition of Nonpareil and Carmel Almond Hulls
Source: MDPI journal article supplement (doi:10.3390/metabo11100674), 2021-09-30
Supplement: s1 [file s1]

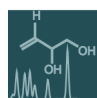

## Supplementary Data

# Restricted nitrogen and water applications in the orchard modify the carbohydrate and amino acid composition of Nonpareil and Carmel almond hulls

Anjali Zaveri <sup>1\*</sup>, Simone Rochfort <sup>1,2</sup> and Jacqueline Edwards <sup>1,2</sup><sup>1</sup> School of Applied Systems Biology, La Trobe University, Bundoora, VIC 3083, Australia<sup>2</sup> Agriculture Research Victoria, 5 Ring Road, Bundoora, VIC 3083, Australia

\* Correspondence: anjali.zaveri@agriculture.vic.gov.au;

**Table S1.** Components have been identified in the almond hull of Nonpareil and Carmel varieties.

| Components identified | Nonpareil | Carmel |
|-----------------------|-----------|--------|
| Glucose               | ✓         | ✓      |
| Sucrose               | ✓         | ✓      |
| Fructose              | ✓         | ✓      |
| Xylose                | ✓         | ✓      |
| Asparagine            | ✓         | ✓      |
| Alanine               | ✓         | ✓      |
| Threonine             | ✓         | ✓      |
| Valine                | ✓         | ✓      |
| Isoleucine            | ✓         | ✓      |
| Leucine               | ✓         | ✓      |

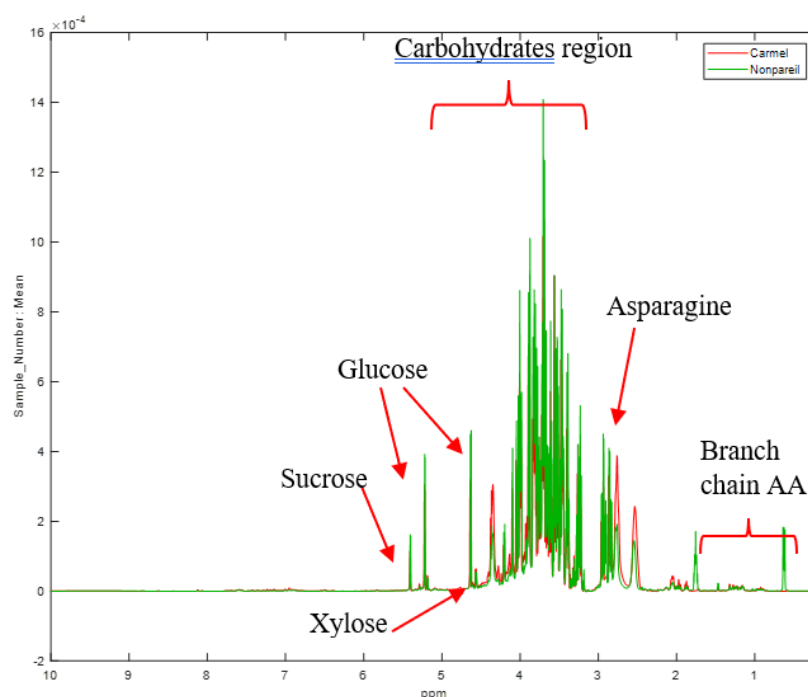

(a)

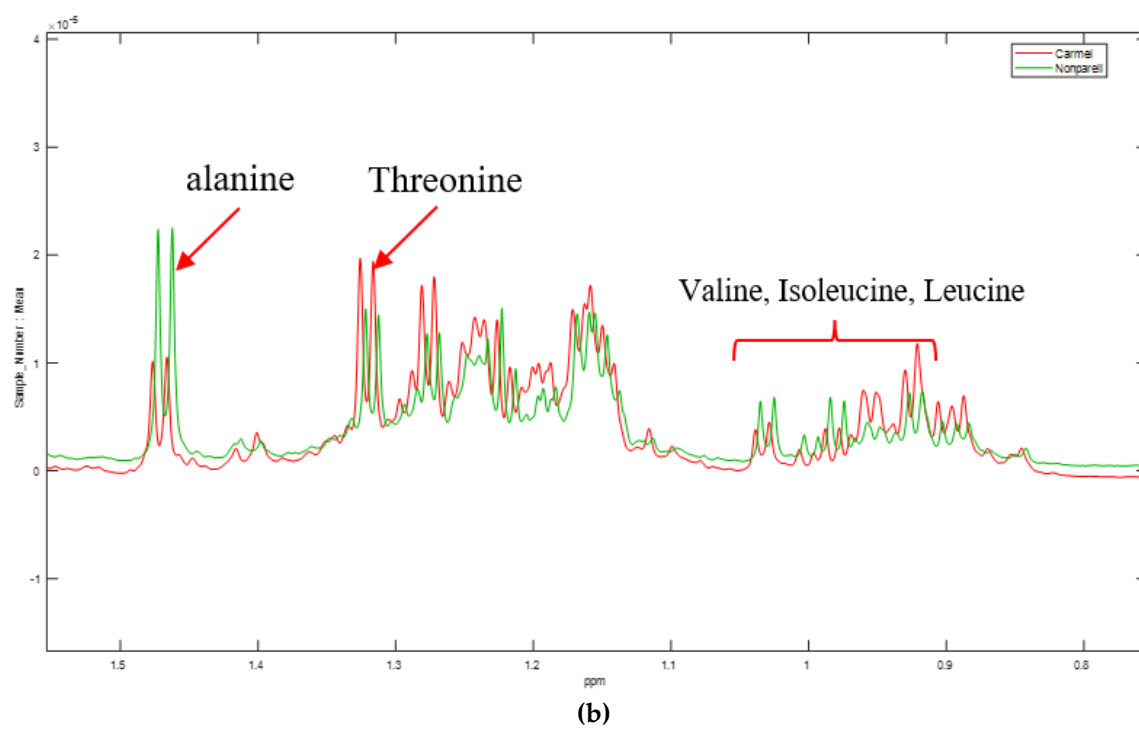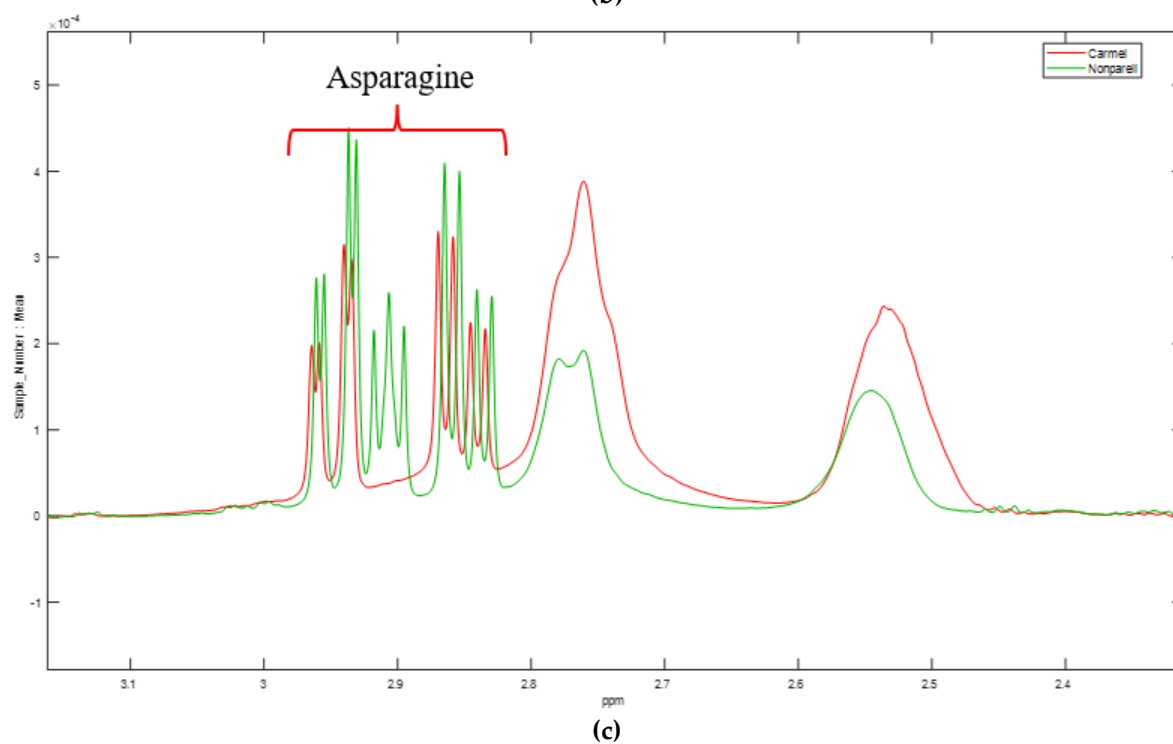

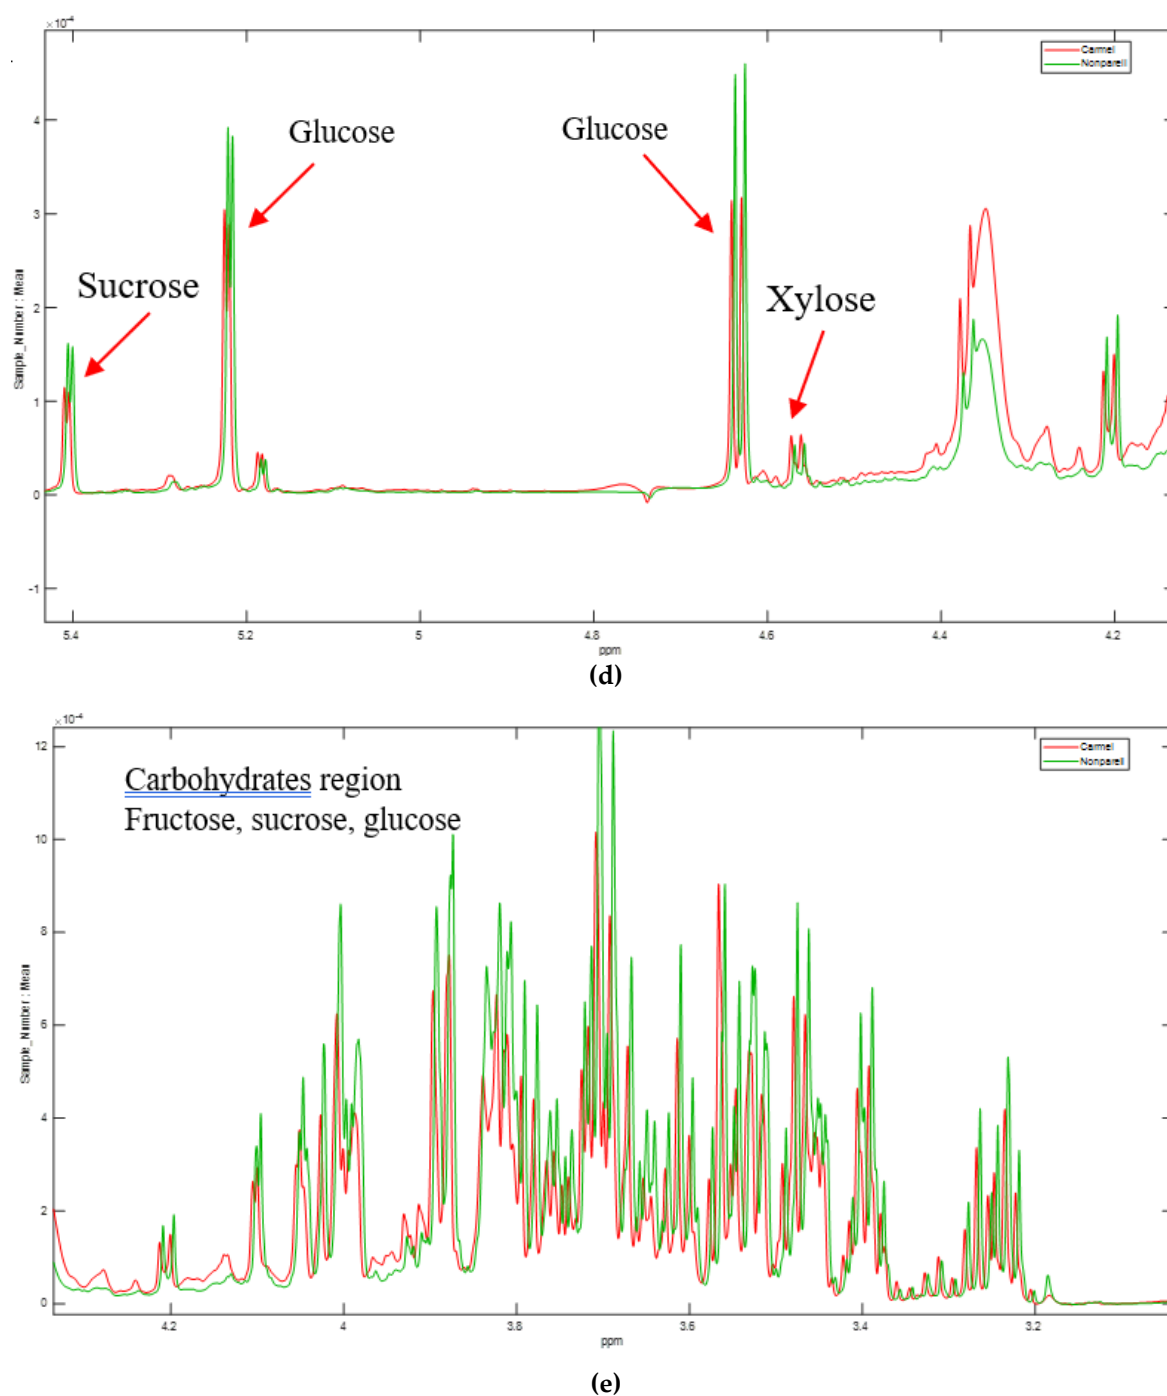

**Figure S1.** Comparison of Nonpareil and Carmel hull components based on loadings plot: components of interest have been identified in almond hull composition of both varieties - glucose, sucrose, fructose, xylose and branch chain amino acids (a) overlap of Nonpareil and Carmel spectra (b) amino acid region: Carmel has elevated level of amino acids (c) Elevated asparagine presence in Nonpareil samples (d) Elevated Glucose (4.51ppm, 5.2ppm), and Sucrose (5.4 ppm) (e) overlapping carbohydrate region: elevated level of carbohydrates in Nonpareil samples.

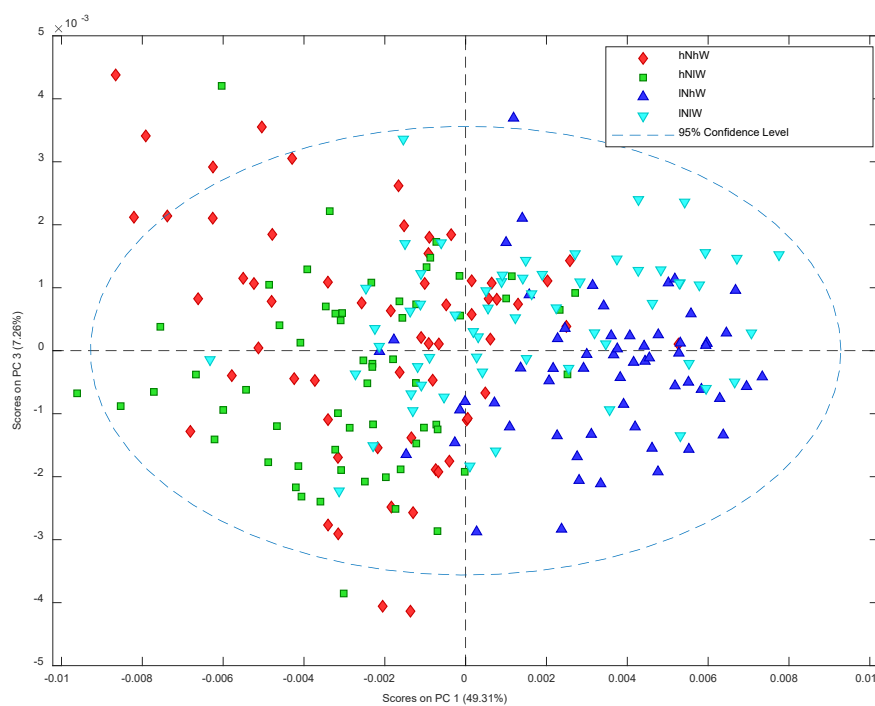

(a)

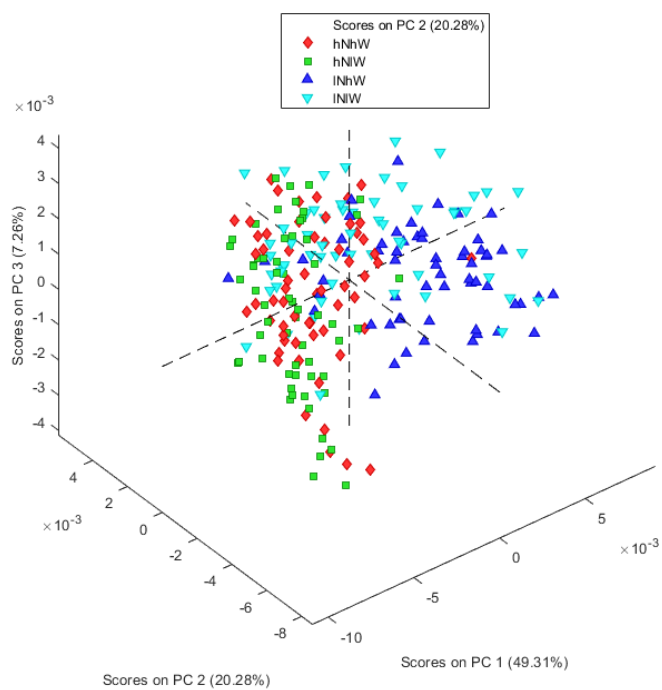

(b)

**Figure S2.** PCA score and loadings plots of  $^1\text{H}$  NMR data of Nonpareil hull: (a) PCA scores plot showing separation of Nonpareil hull samples based on nitrogen treatment; (b) PCA 3D scores plot showing separation of hull samples based on nitrogen treatment.

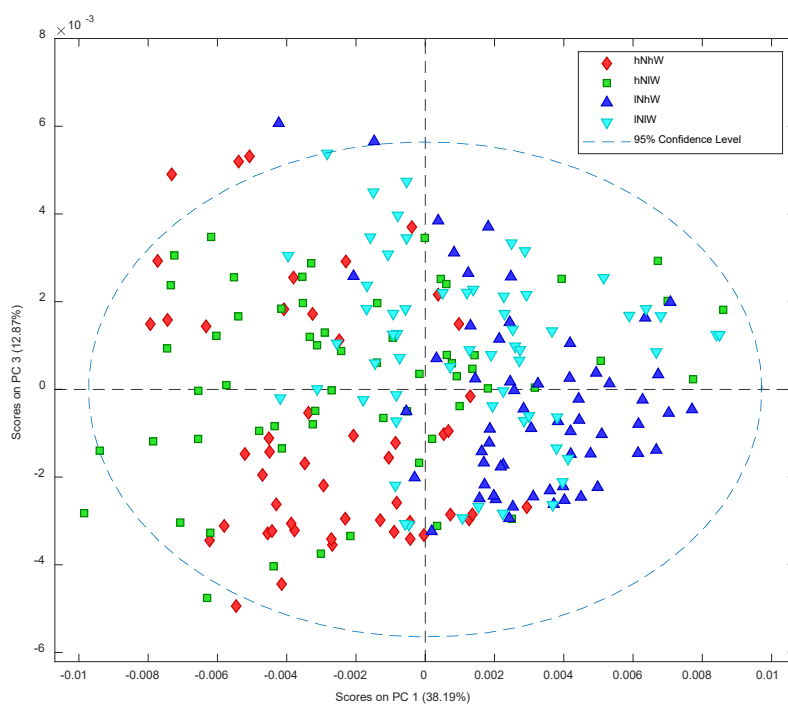

(a)

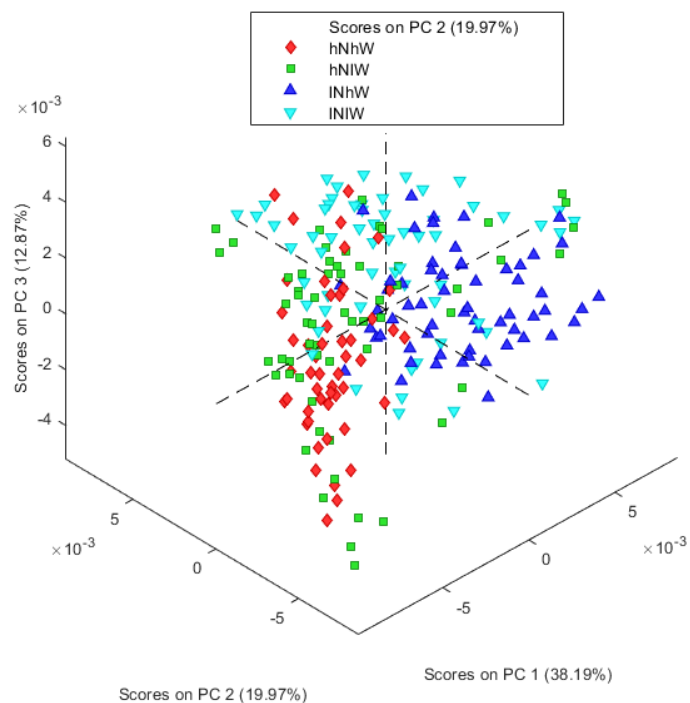

(b)

**Figure S3.** PCA score and loadings plots of  $^1\text{H}$  NMR data of Carmel hull: (a) PCA scores plot showing separation of Carmel hull samples based on nitrogen treatment; (b) PCA 3D scores plot showing separation of hull samples based on nitrogen treatment.
